# Supplementary material for: Gene Networks Underlying Convergent and Pleiotropic Phenotypes in a Large and Systematically-Phenotyped Cohort with Heterogeneous Developmental Disorders
Source: PubMed Central journal article supplement (PMC4362763; doi:10.1371/journal.pgen.1005012), 2015-03-17
Supplement: pgen.1005012.s004.pdf [file pgen.1005012.s004.pdf]

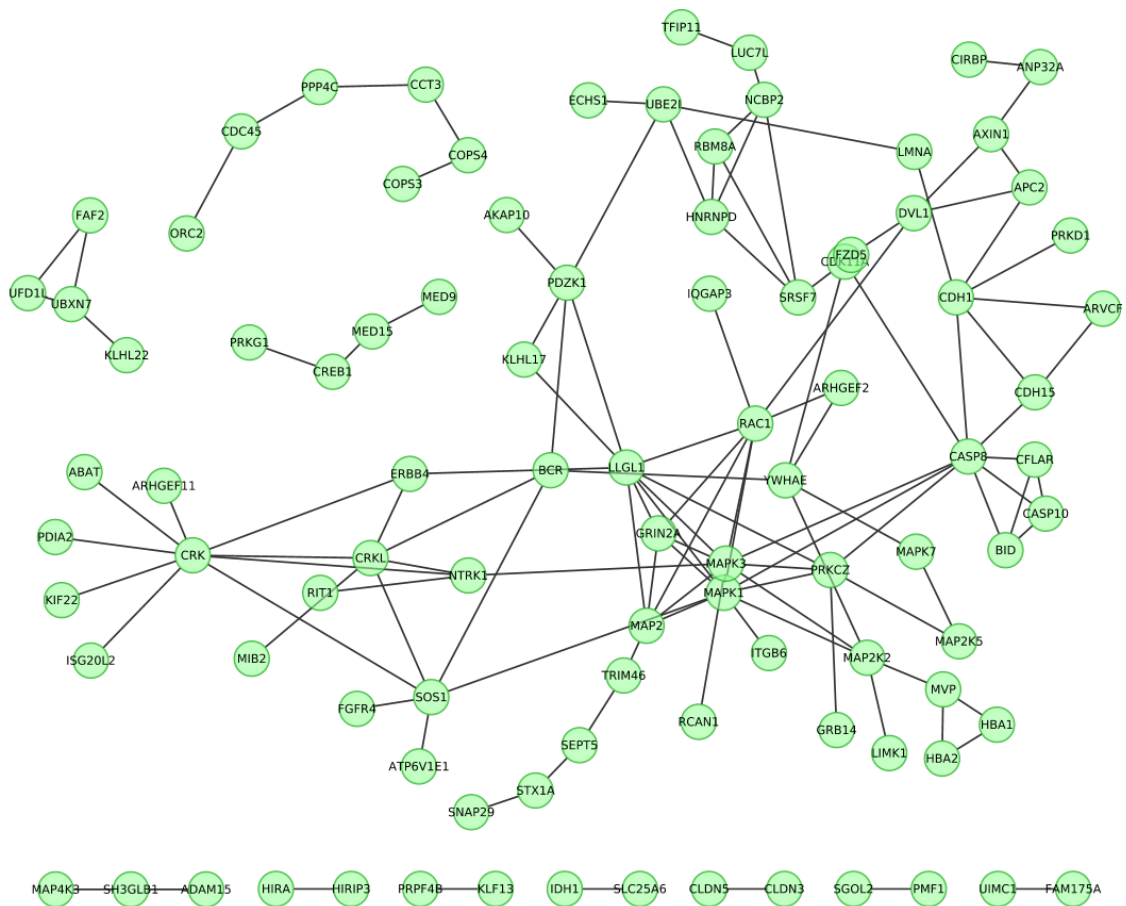

**HP:0008050 Abnormality of the palpebral fissures, Largest Cluster: 66 genes**

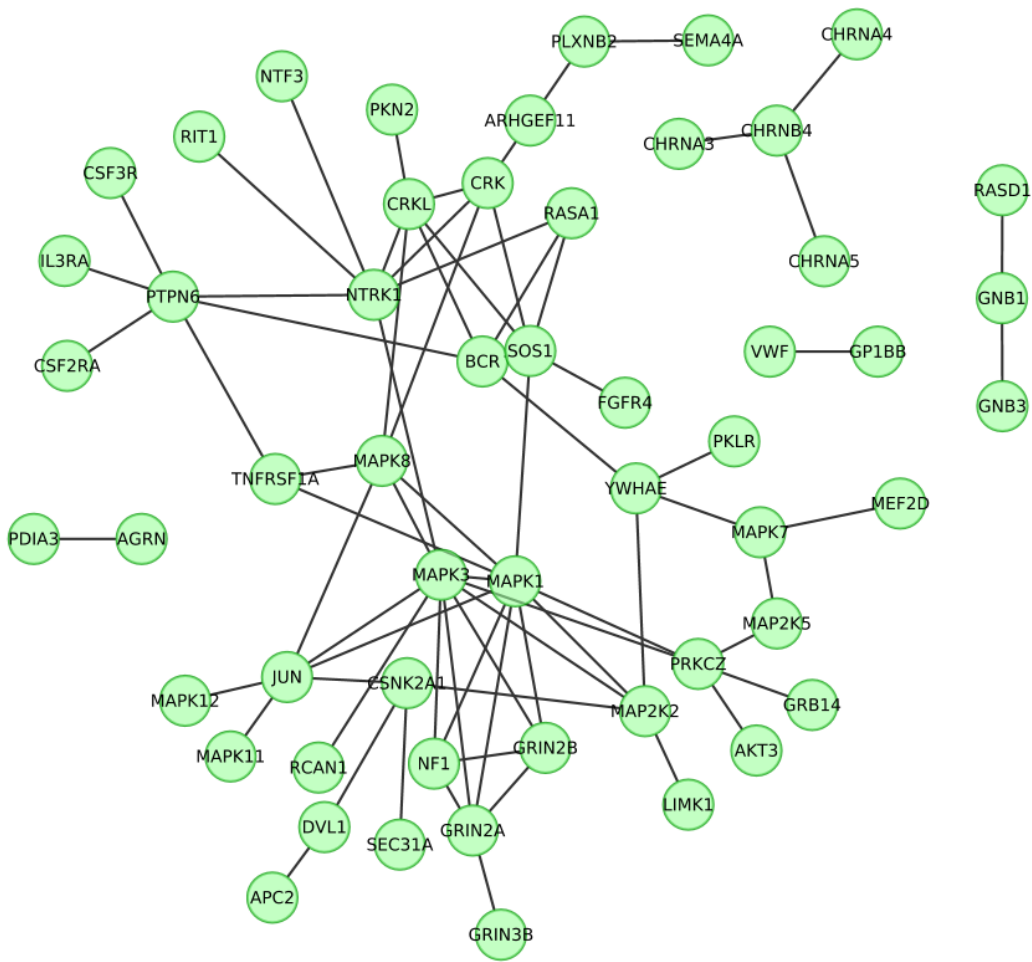

**HP:0009121 Abnormality of the axial skeleton**, Largest cluster: 43 genes

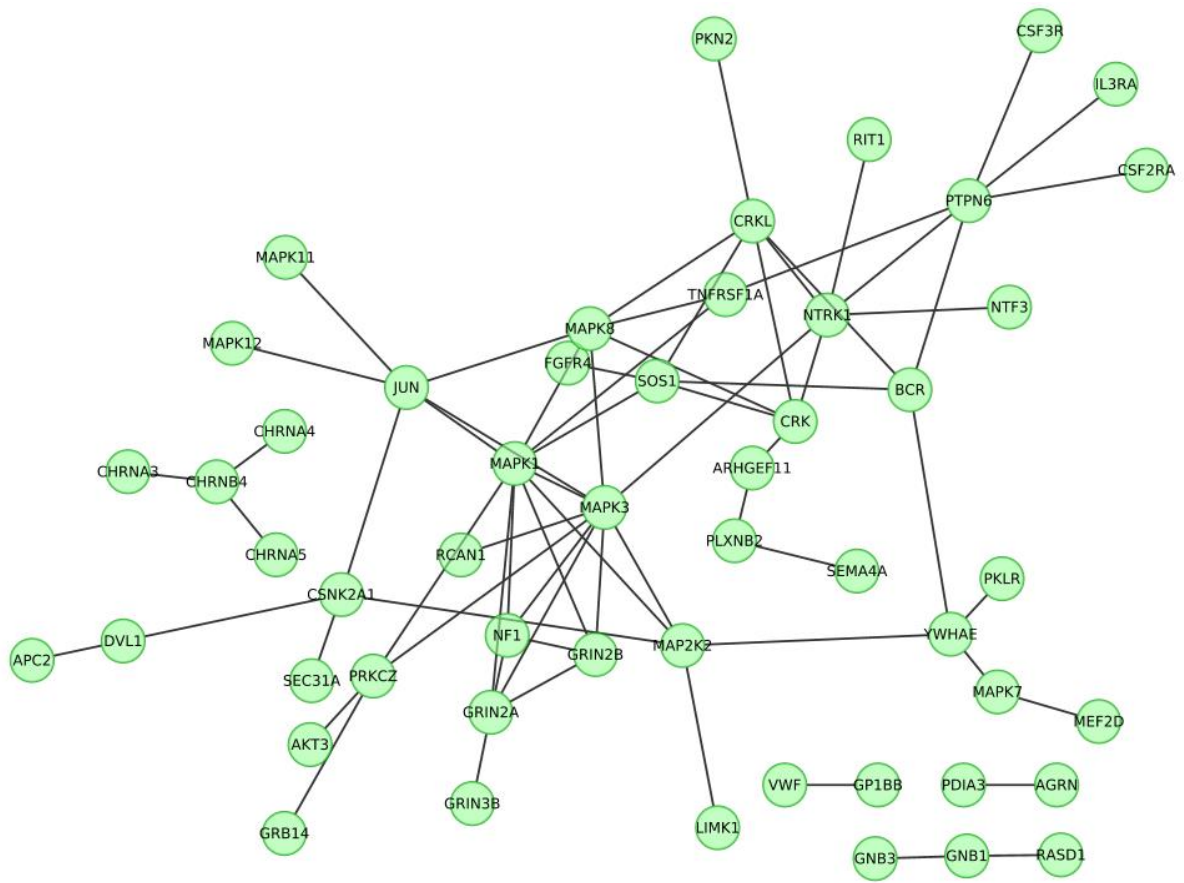

**HP:000929 Abnormality of the skull, Largest cluster: 41 genes**

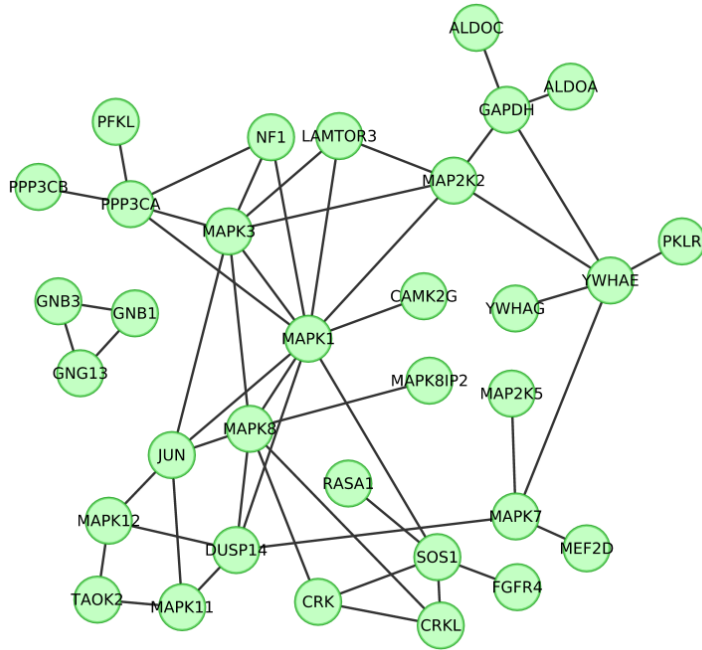

**HP:0001249 Intellectual disability**, Largest cluster: 30 genes

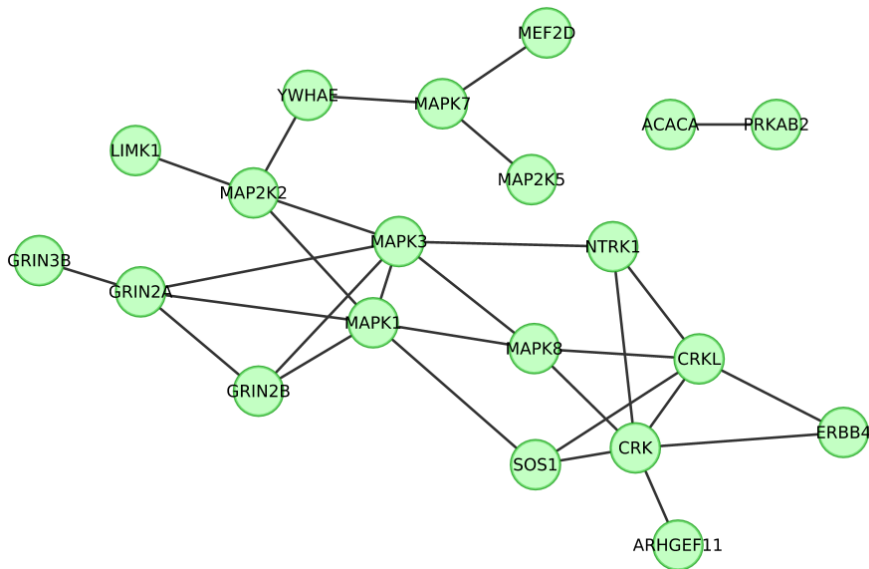

**HP:0000163 Abnormality of the oral cavity**, Largest cluster: 18 genes

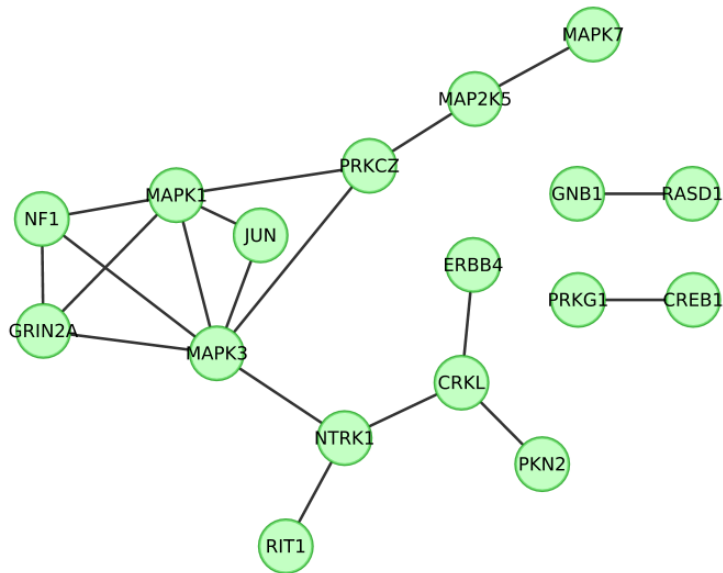

**HP:0001438 Abnormality of the abdomen**, Largest cluster: 13 genes

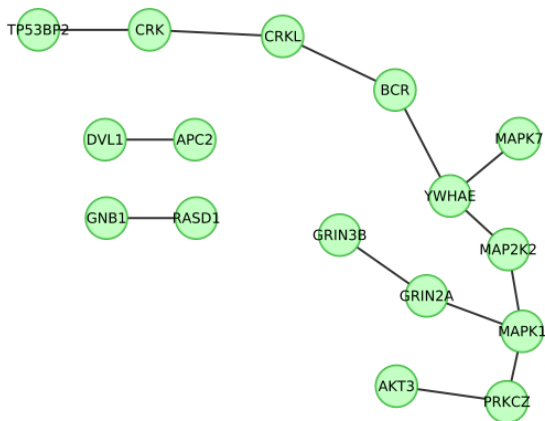

**HP:0007364 Aplasia/Hypoplasia of the cerebrum**, Largest cluster: 12 genes

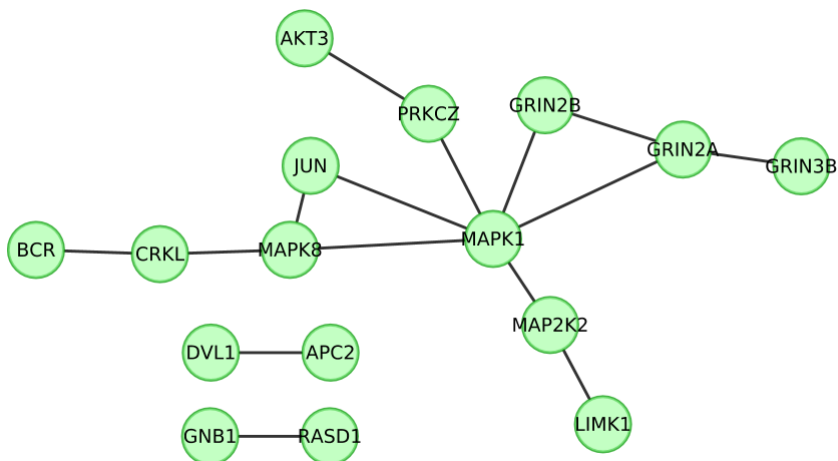

**HP:0000240 Abnormality of skull size**, Largest cluster: 12 genes

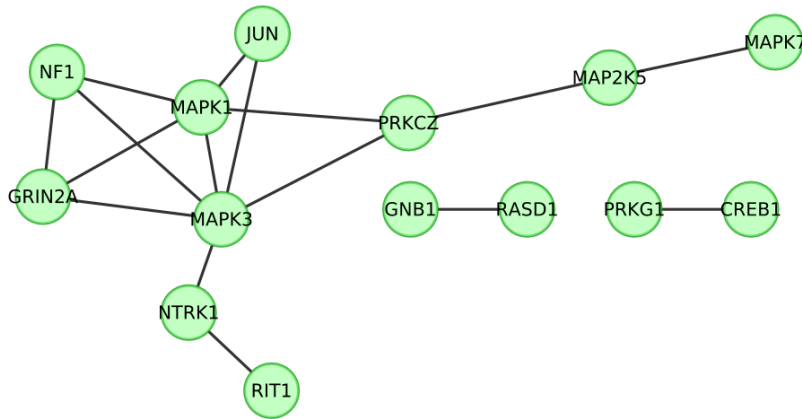

**HP:0002012 Abnormality of the abdominal organs**, Largest cluster: 10 genes

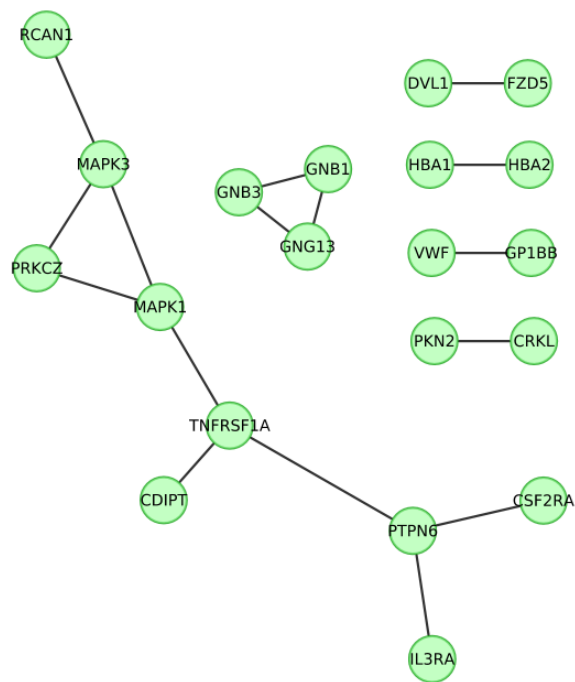

**HP:0001999 Facial dysmorphism**, Largest cluster: 9 genes

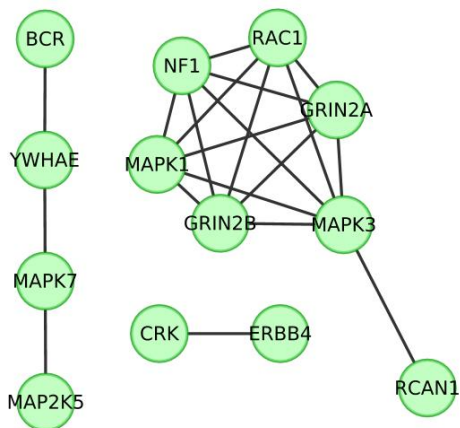

**HP:0000209/HP:0000277 Abnormality of the mandible/jaws**, Largest cluster: 7 genes

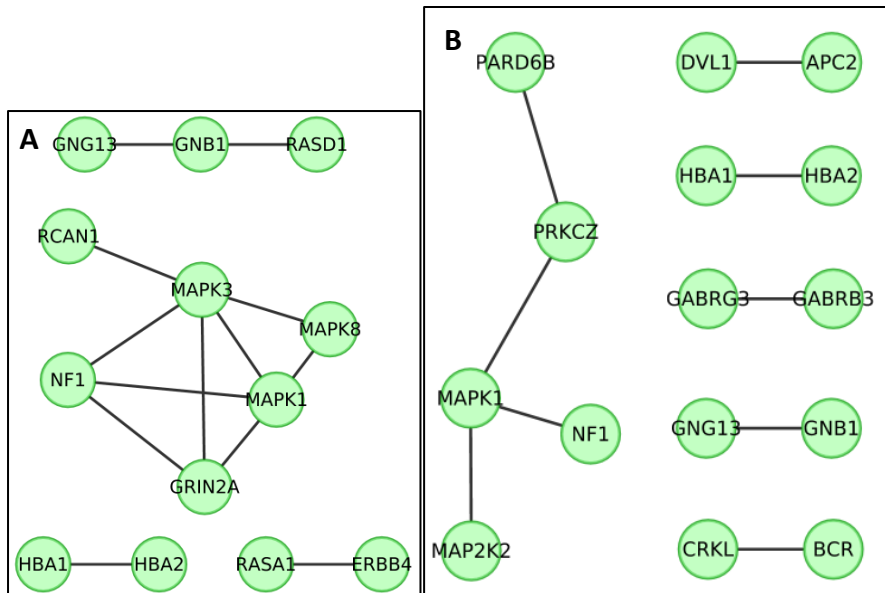

**(A) HP:0000422 Abnormality of the nasal bridge**, Largest cluster: 6 genes

**(B) HP:0000119 Abnormality of the genitourinary system**, Largest cluster: 5 genes

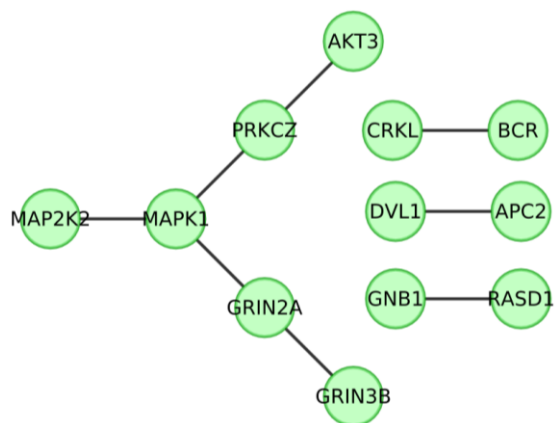

**HP:0000252 Microcephaly**, Largest cluster: 6 genes

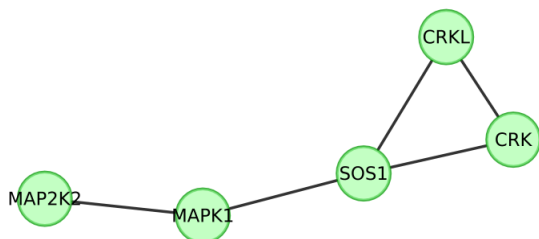

**HP:0000164 Abnormality of the teeth**, Largest cluster: 5 genes
